# Supplementary material for: Microfluidic Fabrication of Morphology-Controlled Polymeric Microspheres of Blends of Poly(4-butyltriphenylamine) and Poly(methyl methacrylate)
Source: MDPI journal article supplement (doi:10.3390/ma11040582), 2018-04-10
Supplement: s1 [file s1]

## Supplementary Materials

### Microfluidic Fabrication of Morphology-controlled Polymeric Microspheres of Blends of Poly(4-butyltriphenylamine) and Poly(methyl methacrylate)

Saki Yoshida<sup>1</sup>, Shu Kikuchi<sup>1</sup>, Shinji Kanehashi<sup>1</sup>, Kazuo Okamoto<sup>2</sup>, and Kenji Ogino<sup>1\*</sup>

<sup>1</sup>Graduate School of Bio-Applications and Systems Engineering,  
Tokyo University of Agriculture and Technology,  
2-24-16 Nakacho, Koganei, Tokyo 184-8588, Japan

<sup>2</sup>Ushio Chemix Co., Ltd., Kakegawa, Shizuoka 437-1302, Japan

\* Correspondence: kogino@cc.tuat.ac.jp; Tel/Fax: +81-42-388-7404

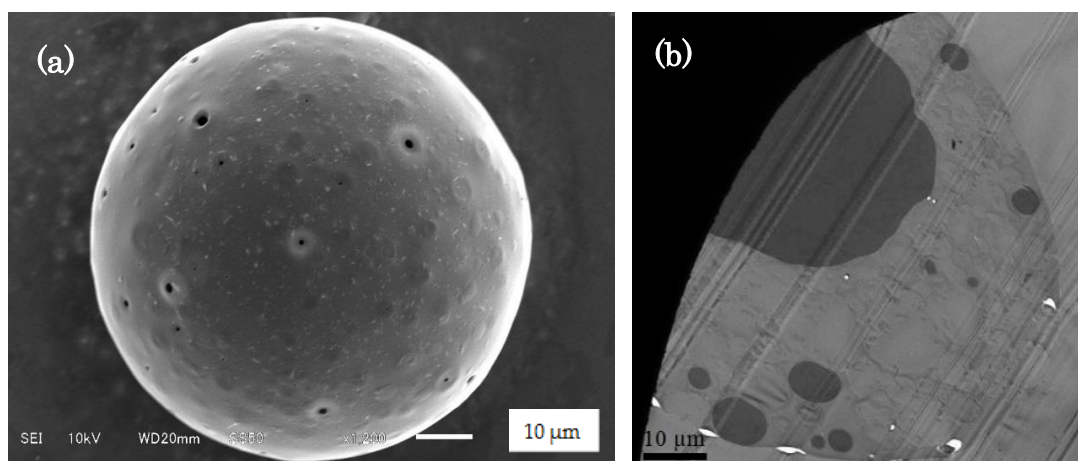

**Figure S1.** SEM (expanded) (a) and TEM (b) images of microspheres of PBTPA / PMMA prepared with the condition A1 as listed in Table 1.

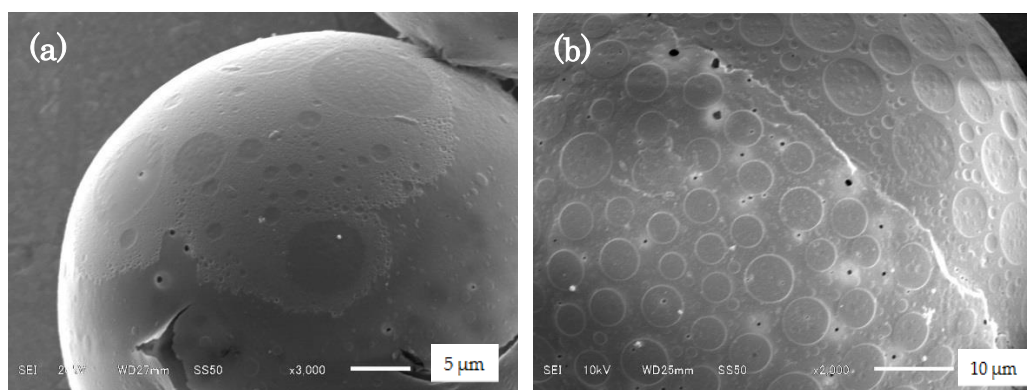

**Figure S2.** Surface SEM image of microspheres of PBTPA / PMMA prepared with the conditions B1(a) and C1(b) as listed in Table 1.
